# Supplementary material for: Perylene diimide architecture-based electromechanical sensors: a systematic experimental and theoretical framework for the comparative analysis and study of the transduction mechanism
Source: Royal Society of Chemistry journal article supplement (doi:10.1039/d4ma00846d), 2024-01-01
Supplement: d4ma00846d1.pdf [file d4ma00846d1.pdf]

## **Supporting Information**

### **Perylene Diimide Architectures Based Electromechanical Sensors: A Systematic Experimental and Theoretical Framework for Comparative Analysis and Study of Transduction Mechanism**

*Aditya Tiwari<sup>1</sup>, Vivek Adepu<sup>2</sup>, Rikitha S Fernandes<sup>3</sup>, Nilanjan Dey<sup>3\*</sup>, Parikshit Sahatiya<sup>2,4\*</sup>  
and Sayan Kanungo,<sup>2,4\*</sup>*

<sup>1</sup> *Department of Electronics and Communication Engineering, Amrita School of Engineering,  
Bengaluru- 560035, Amrita Vishwa Vidyapeetham, India.*

<sup>2</sup> *Department of Electrical and Electronics Engineering, Birla Institute of Technology and  
Science Pilani, Hyderabad Campus, Hyderabad 500078, India*

<sup>3</sup> *Department of Chemistry, Birla Institute of Technology and Science Pilani, Hyderabad Campus,  
Hyderabad 500078, India*

<sup>4</sup> *Materials Center for Sustainable Energy & Environment, Birla Institute of Technology and Science  
Pilani, Hyderabad Campus, Hyderabad – 500078, India*

<sup>2,4</sup> *E-mail: [parikshit@hyderabad.bits-pilani.ac.in](mailto:parikshit@hyderabad.bits-pilani.ac.in), [sayan.kanungo@hyderabad.bits-pilani.ac.in](mailto:sayan.kanungo@hyderabad.bits-pilani.ac.in), and*

<sup>3</sup> *E-mail: [nilanjan@hyderabad.bits-pilani.ac.in](mailto:nilanjan@hyderabad.bits-pilani.ac.in)*

## Experimental section

The detailed synthetic procedure and characterization data have been described below:

**N,N'-bis-(2,9-pentan-3-yl)-perylene-3,4,9,10- tetracarboxydiimide (PDI-1):** A mixture of perylene bisanhydride (1 g, 2.5 mmol), 3-aminopentane (2 mL), and imidazole (4 g, 58.8 mmol) was stirred at 140 °C for 12 h. Then, the reaction mixture was cooled down to room temperature and ~150 mL of water. The red solid was collected, washed with water and brine until neutral, and dried in a vacuum. The final compound **PDI-1** was obtained as red powder (yield: 47 %) was obtained. IR (KBr,  $\text{cm}^{-1}$ ) 3641, 3411, 2956, 1700, 1655, 1596, 1340, 1252, 1198, 958, 805, 741  $\text{cm}^{-1}$ ;  $^1\text{H}$  NMR (400 MHz,  $\text{CDCl}_3$ )  $\delta$  ppm : 8.67 (d,  $J = 8.0$  Hz 4H), 8.62 (d,  $J = 8.0$  Hz, 4H), 5.11-5.03 (m, 2H), 2.32 – 2.23 (m, 4H), 2.00 – 1.90 (m, 4H), 0.93 (t,  $J = 7.5$  Hz, 12H).  $^{13}\text{C}$  NMR (100 MHz,  $\text{CDCl}_3$ )  $\delta$  ppm: 164.1, 134.2, 130.3, 129.4, 126.2, 122.8, 57.7, 24.9, 11.3. LCMS  $m/z$  calcd.  $\text{C}_{34}\text{H}_{30}\text{N}_2\text{O}_4$   $[\text{M} + \text{H}]^+$  530.2, found 530.0.

**N,N'-bis-(2,5-di-tert-butylphenyl)-perylene-3,4,9,10- tetracarboxydiimide (PDI-2):** A mixture of perylene bisanhydride (2.0 g, 5.2 mmol) and excess 2,5-di-tert-Butylaniline (2.2 g) were taken in 15 mL of propionic acid under  $\text{N}_2$  atmosphere, the reaction mixture was stirred and heated at 140 °C for 8 h. After being cooled to room temperature, the resulting solution was poured into ~100 mL of water. The red solid was collected, washed with water, and brine until neutral, and dried in a vacuum. The crude product was purified by silica gel column chromatography ( $\text{CH}_2\text{Cl}_2/\text{PE}$ : 1:1 in v/v). The final compound, **PDI-2**, was obtained as an orange-red solid (yield: 35 %). IR (KBr,  $\text{cm}^{-1}$ ) 3659, 3438, 2959, 1704, 1669, 1511, 1347, 1254, 1198, 967, 816, 672  $\text{cm}^{-1}$ ,  $^1\text{H}$  NMR (400 MHz,  $\text{CDCl}_3$ )  $\delta$  ppm: 8.78 (d,  $J = 8.0$  Hz, 4H), 8.72 (d,  $J = 8.0$  Hz, 4H), 7.61 (d,  $J = 8.6$  Hz, 2H), 7.48 (m,  $J = 8.6$  Hz, 2H), 7.06 – 7.01 (m, 2H), 1.34 (s, 18H), 1.31 (d,  $J = 2.2$  Hz, 18H).  $^{13}\text{C}$  NMR (100 MHz,  $\text{CDCl}_3$ )  $\delta$  ppm: 164.3, 150.1, 143.7, 135.0, 132.5, 131.8, 129.8, 128.8, 127.6, 126.7, 123.6, 123.4, 35.5, 34.2, 31.7. LCMS  $m/z$  calcd.  $\text{C}_{52}\text{H}_{50}\text{N}_2\text{O}_4$   $[\text{M} + \text{H}]^+$  766.3, found 766.0.

**N,N'-bis-(1'-phenylethyl)-perylene-3,4,9,10- tetracarboxydiimide (PDI-3):** Perylene bisanhydride (1.5 g, 3.6 mmol), freshly distilled 1-phenylethylamine (1.16 mL, 9.6 mmol) and 30 g of imidazole were introduced under an inert ( $\text{N}_2$ ) atmosphere and the system was warmed up to 180 °C and stirred

for four h. The crude product was then cooled at room temperature. After cooling, ~200 mL of 2 M HCl was added, and the system was left overnight under vigorous stirring. The resulting dark-red solid was filtered off and washed thoroughly with distilled water until the washings' pH turned neutral. The crude product was purified by silica gel column chromatography (CH<sub>2</sub>Cl<sub>2</sub>/ethyl acetate = 20:1 in v/v). The pure compound **PDI-3** was obtained as red needle-shaped crystals (yield: 52 %). IR (KBr, cm<sup>-1</sup>) 3523, 3441, 2927, 1692, 1596, 1333, 1255, 963, 748 cm<sup>-1</sup>, <sup>1</sup>H NMR (400 MHz, CDCl<sub>3</sub>) δ ppm: 8.63 (d, *J* = 8.0 Hz, 4H), 8.56 (d, *J* = 8.0 Hz, 4H), 7.56 – 7.52 (m, 4H), 7.37 – 7.32 (m, 4H), 7.26 - 7.24 (m, 2H), 6.57 (q, *J* = 7.1 Hz, 2H), 2.03 (d, *J* = 7.1 Hz, 6H). <sup>13</sup>C NMR (101 MHz, CDCl<sub>3</sub>): δ 163.7, 134.6, 131.8, 128.9, 128.3, 127.9, 127.5, 127.1, 127.0, 126.4, 124.5, 124.3, 123.6, 51.6, 51.1, 50.9, 39.5, 38.8, 33.7, 27.2, 26.9, 16.8, LCMS m/z calcd. C<sub>40</sub>H<sub>26</sub>N<sub>2</sub>O<sub>4</sub> [M + H]<sup>+</sup> 598.2, found 598.0.

**N,N'-bis-[2-(2,5-di-tert-butylphenyl)-9-(1-phenylethyl)]-perylene-3,4,9,10- tetracarboxydiimide (PDI-4):** A mixture of perylene-3,4,9,10-tetracarboxylic dianhydride (1 g, 2.55 mmol), imidazole (13.5 g, 200 mmol), 1-phenylethylamine (370 mg, 3 mmol), and 2,5-Di-tert-butylaniline (637 mg, 3.1 mmol) was heated at 130 °C for 2 h. The crude product was purified by column chromatography (1:1 DCM/hexanes) to obtain pure **PDI-4** as a red solid (yield: 39%). IR (KBr, cm<sup>-1</sup>) 3936, 3442, 3314, 2962, 1708, 1664, 1536, 1347, 1213, 975, 641 cm<sup>-1</sup>, <sup>1</sup>H NMR (400 MHz, CDCl<sub>3</sub>) δ ppm: 8.74 (d, *J* = 8.0 Hz, 2H), 8.66 – 8.63 (m, 3H), 8.62 – 8.59 (m, 3H), 7.60 (d, *J* = 8.0 Hz, 1H), 7.55 (d, *J* = 7.1 Hz, 2H), 7.48 (m, 1H), 7.38 – 7.33 (m, 2H), 7.29 - 6.98 (m, 1H), 7.05 (d, *J* = 2.2 Hz, 1H), 6.61 – 6.54 (m, 1H), 2.04 (m, 3H), 1.34 (s, 9H), 1.30 (s, 9H). <sup>13</sup>C NMR (100 MHz, CDCl<sub>3</sub>) δ ppm: 164.4, 163.4, 150.1, 140.5, 134.9, 134.5, 131.8, 131.7, 131.6, 130.8, 128.8, 127.7, 127.2, 126.3, 123.6, 123.1, 50.4, 35.5, 34.2, 31.2, 16.2. LCMS m/z calcd. C<sub>46</sub>H<sub>38</sub>N<sub>2</sub>O<sub>4</sub> [M + H]<sup>+</sup> 682.3, found 682.0

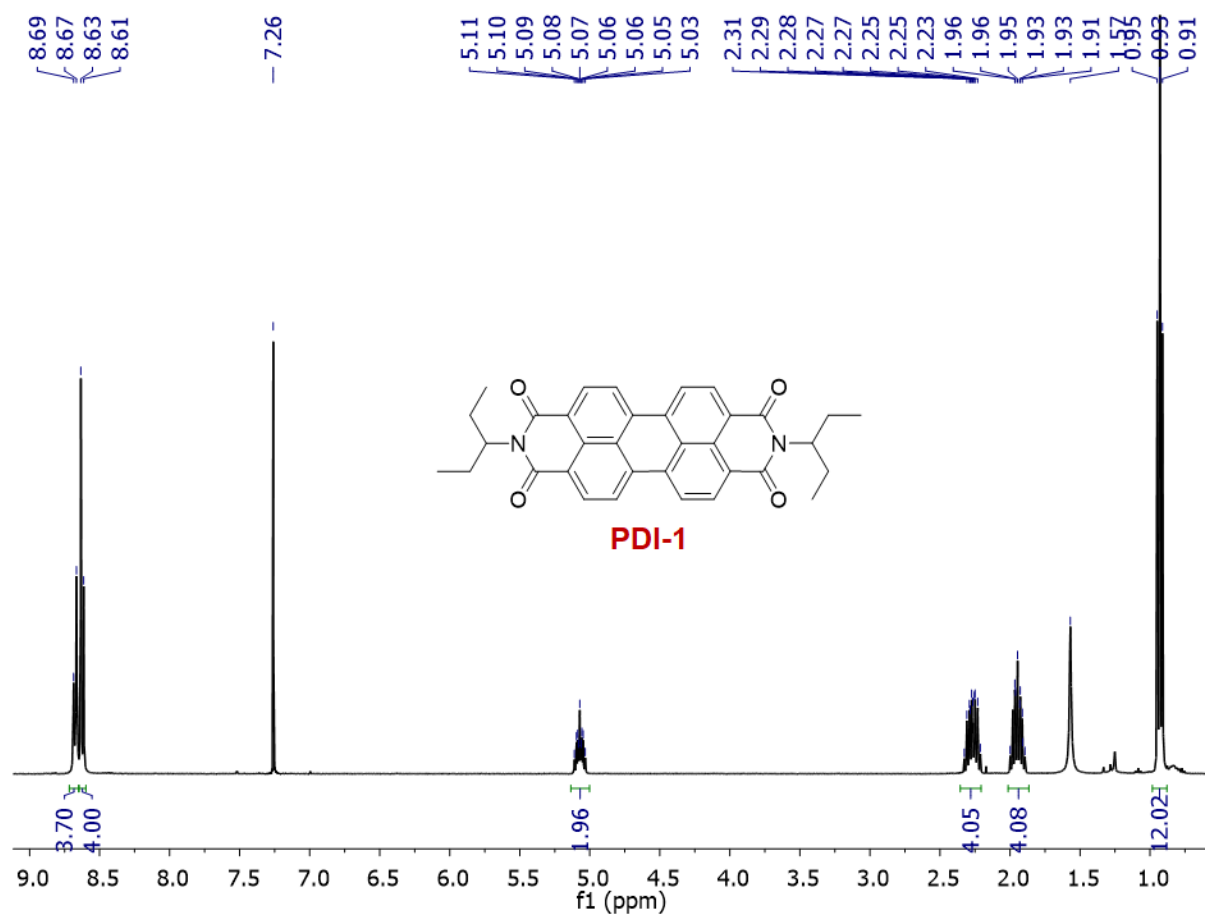

**Figure S1.** <sup>1</sup>H-NMR spectrum of **PDI-1** in CDCl<sub>3</sub> medium.

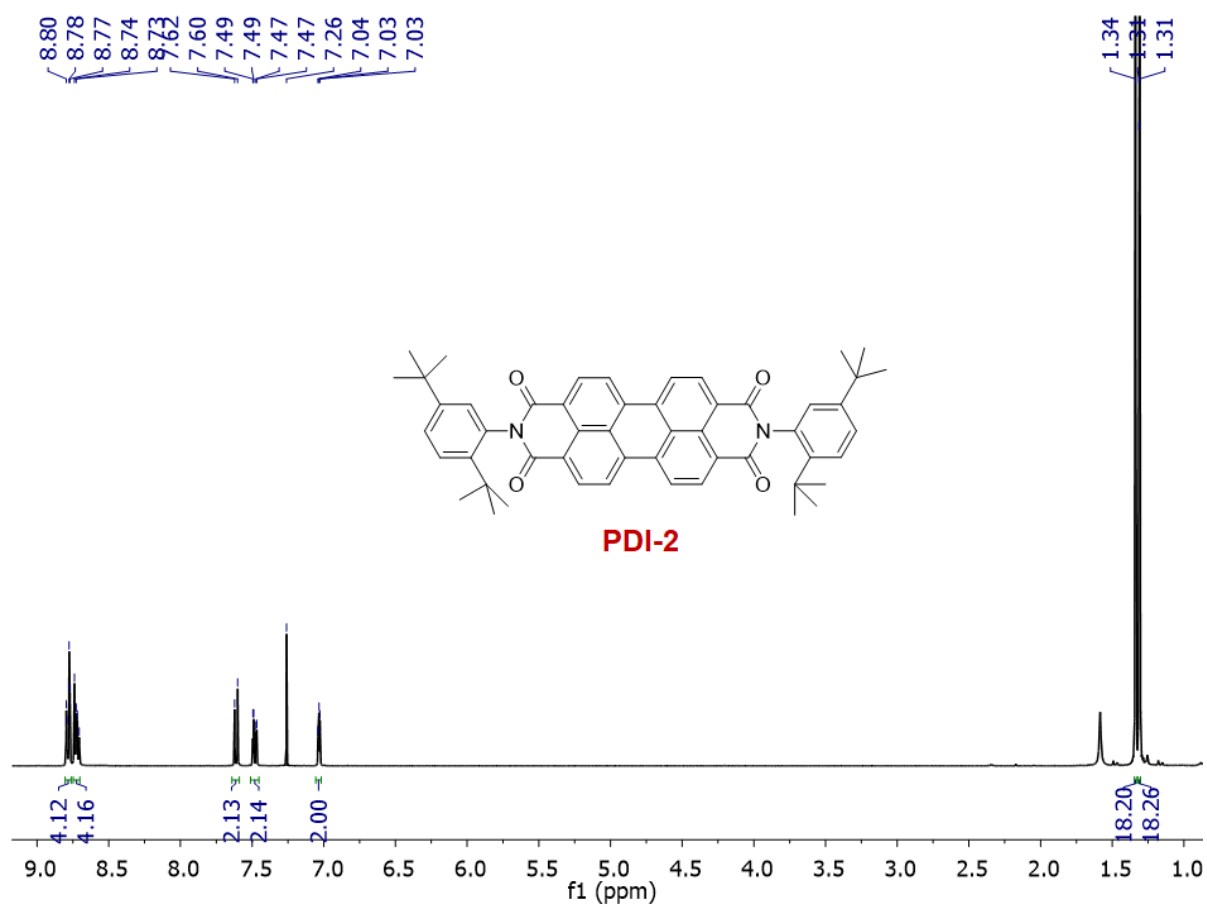

**Figure S2.** <sup>1</sup>H-NMR spectrum of **PDI-2** in CDCl<sub>3</sub> medium.

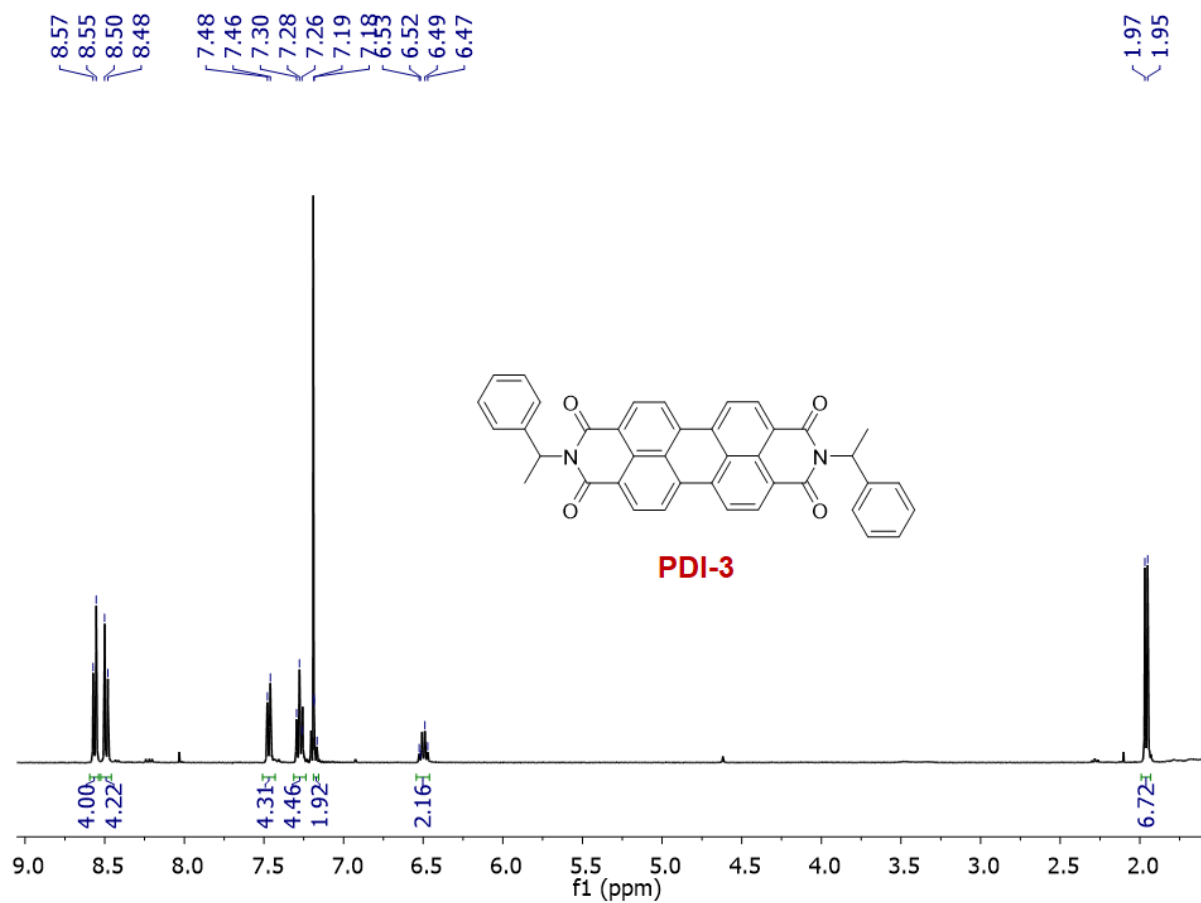

**Figure S3.** <sup>1</sup>H-NMR spectrum of **PDI-3** in CDCl<sub>3</sub> medium.

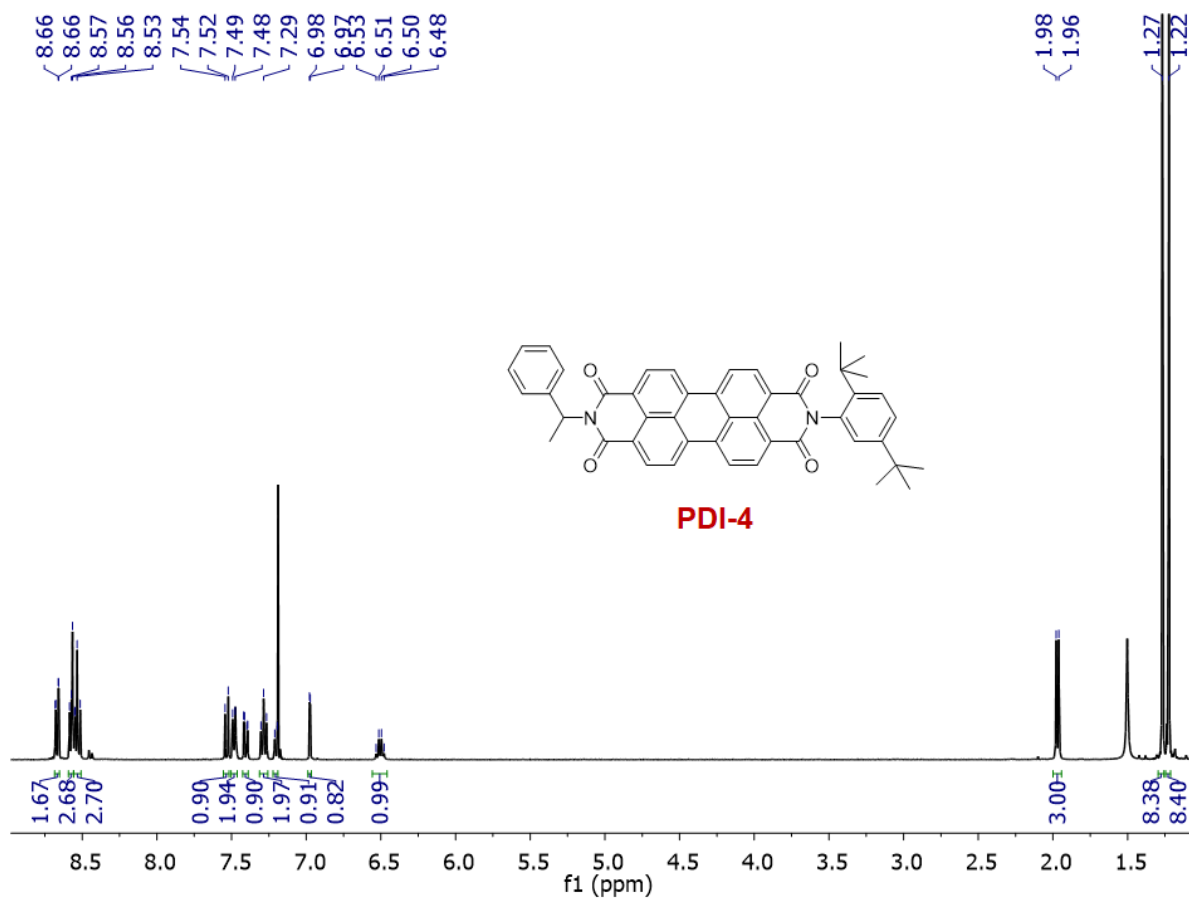

Figure S4. <sup>1</sup>H-NMR spectrum of **PDI-4** in CDCl<sub>3</sub> medium.

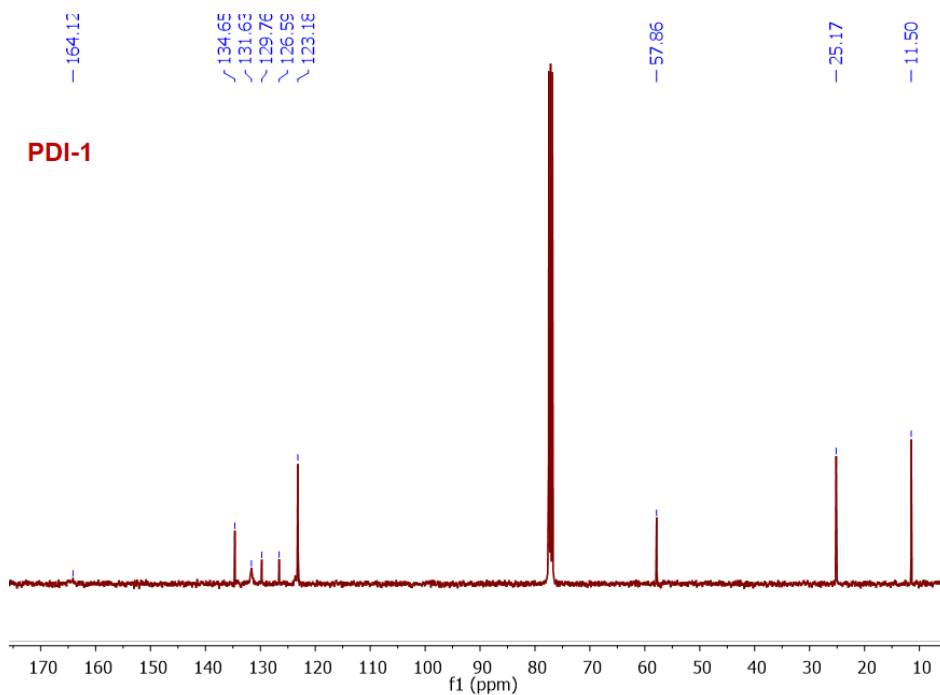

Figure S5. <sup>13</sup>C-NMR spectrum of **PDI-1** in CDCl<sub>3</sub> medium.

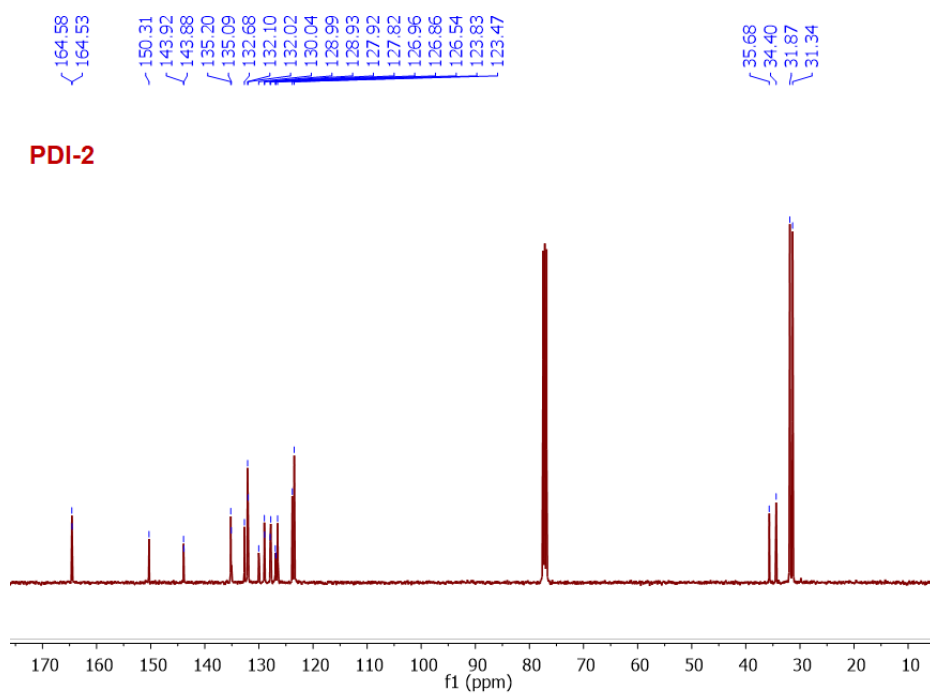

**Figure S6.**  $^{13}\text{C}$ -NMR spectrum of **PDI-2** in  $\text{CDCl}_3$  medium.

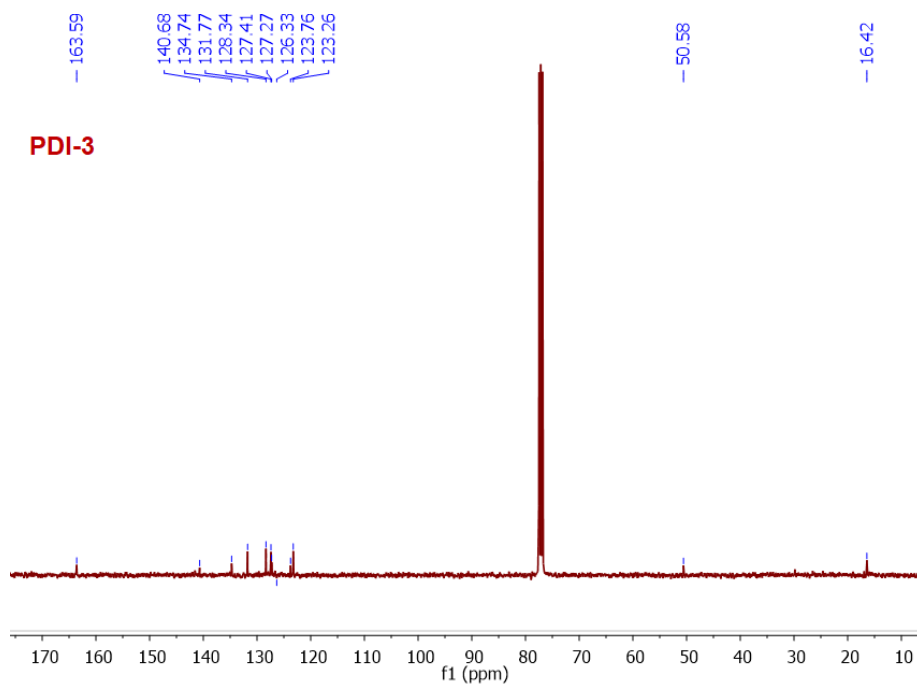

**Figure S7.**  $^{13}\text{C}$ -NMR spectrum of **PDI-3** in  $\text{CDCl}_3$  medium.



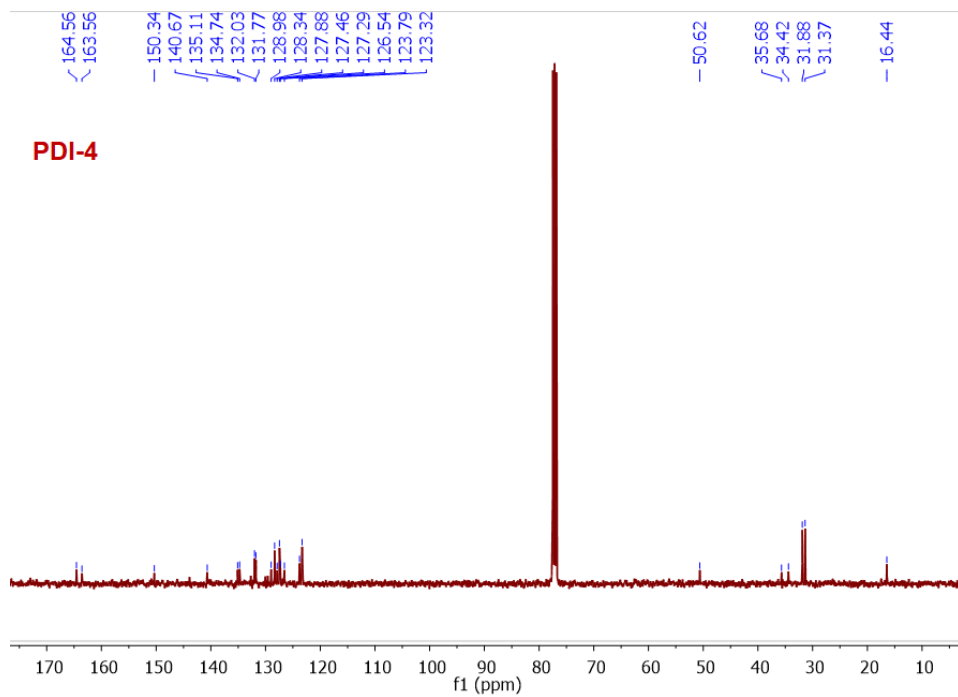

**Figure S8.**  $^{13}\text{C}$ -NMR spectrum of **PDI-4** in  $\text{CDCl}_3$  medium.

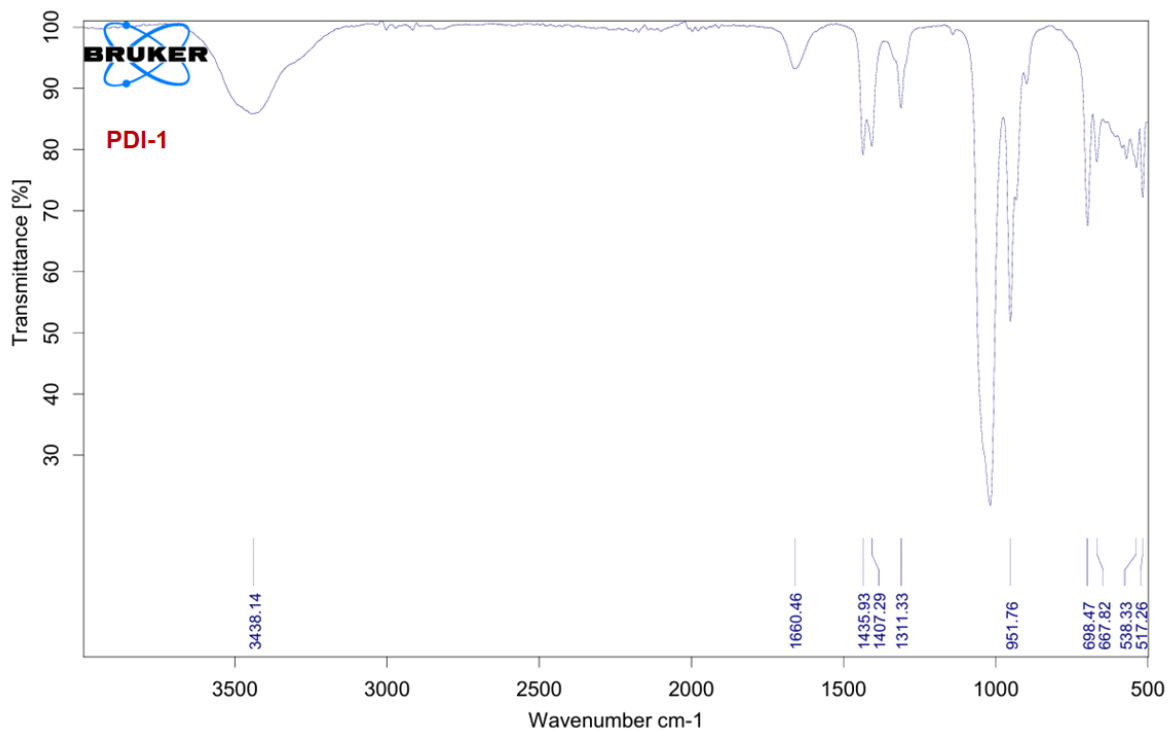

Figure S9. FTIR spectrum of PDI-1

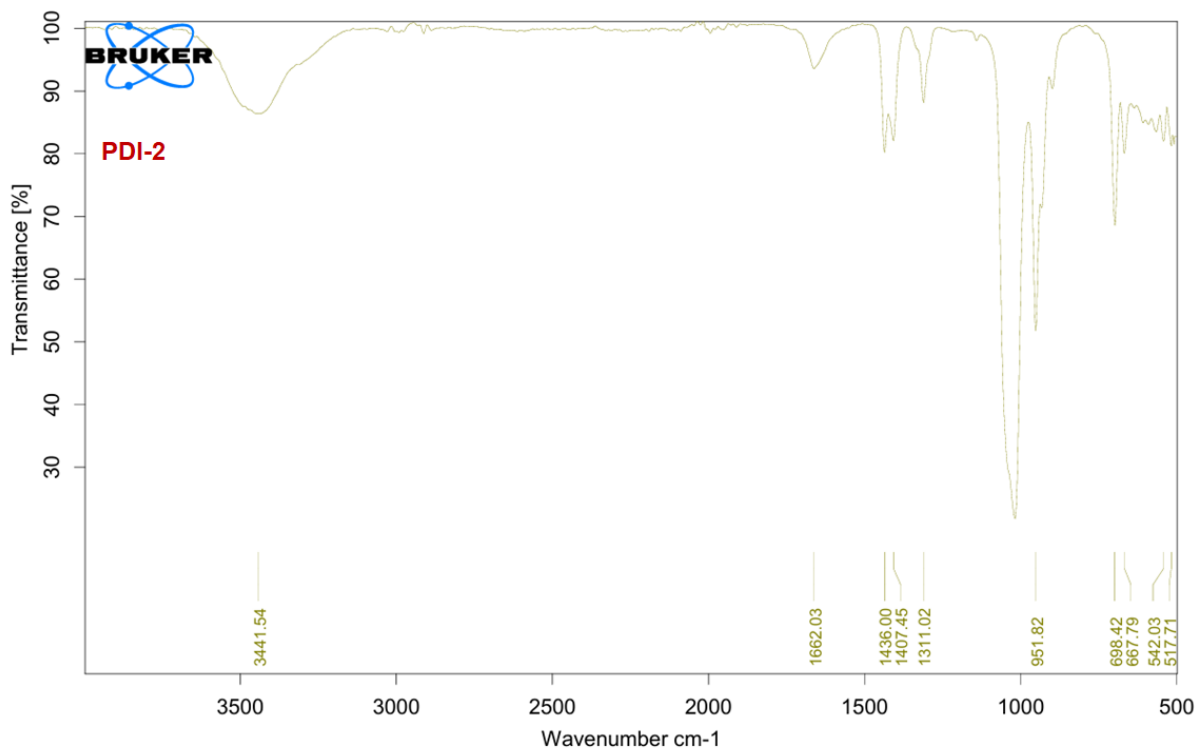

Figure S10. FTIR spectrum of PDI-2

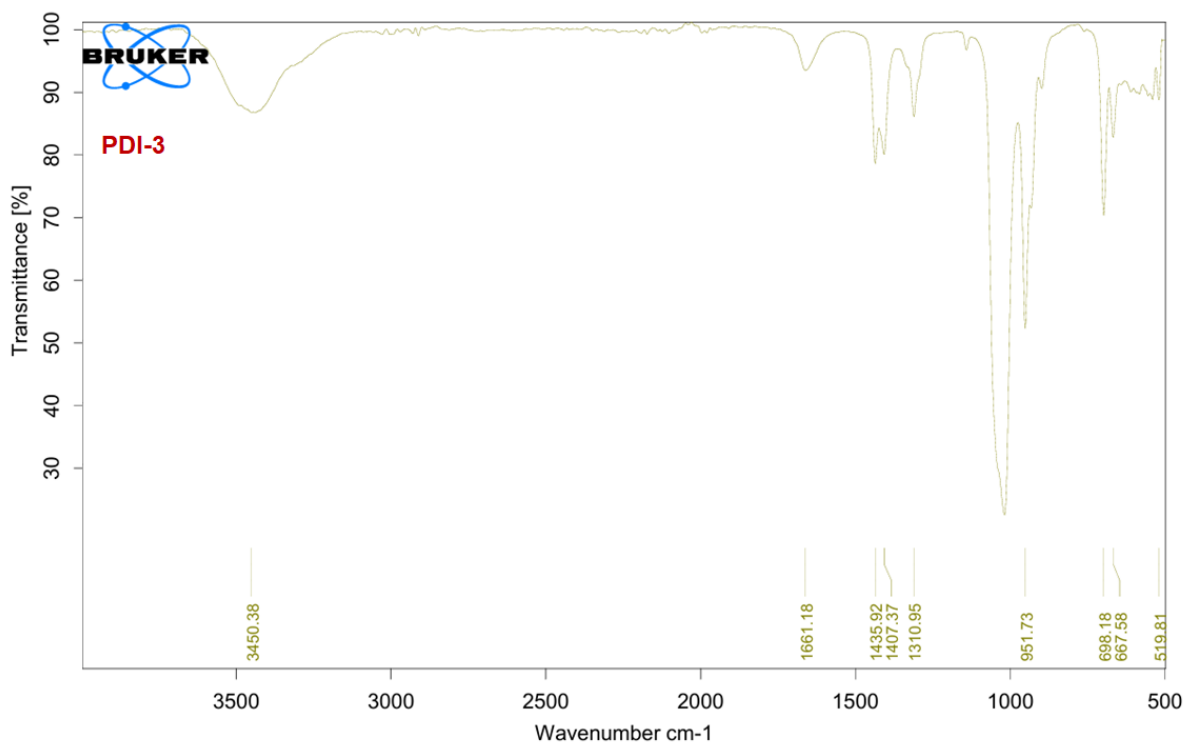

Figure S11. FTIR spectrum of PDI-3

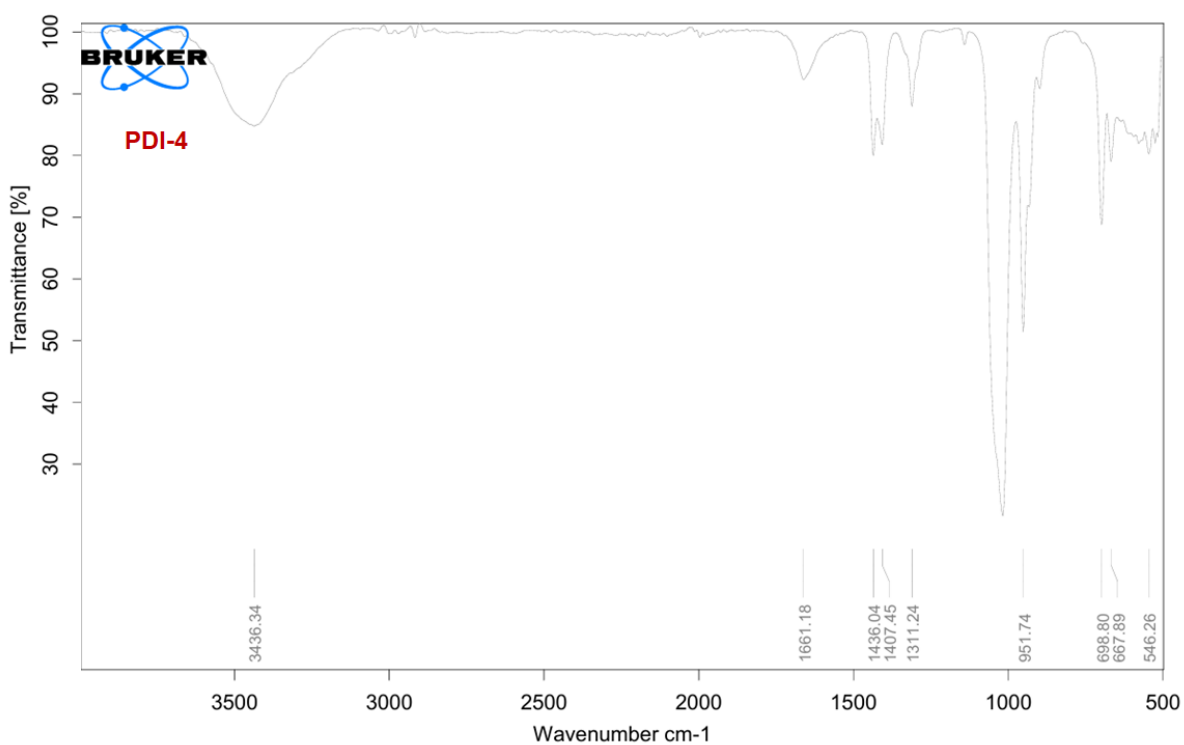

Figure S12. FTIR spectrum of PDI-4

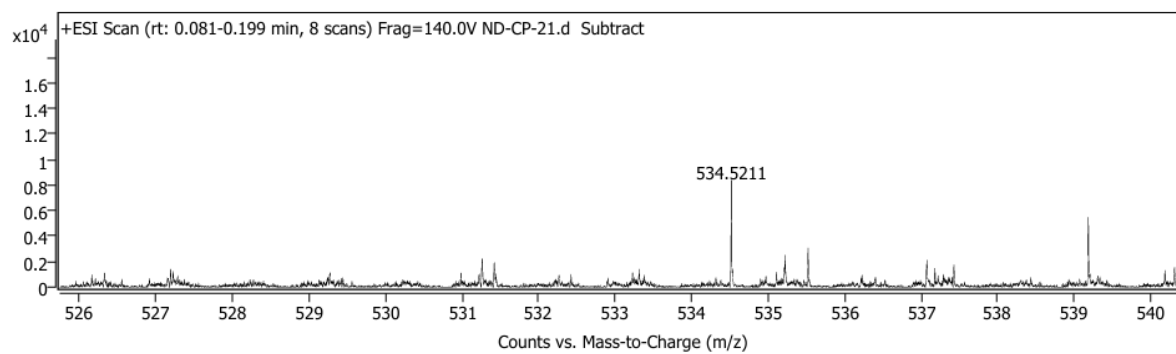

**Figure S13.** HRMS spectra of **PDI-1**

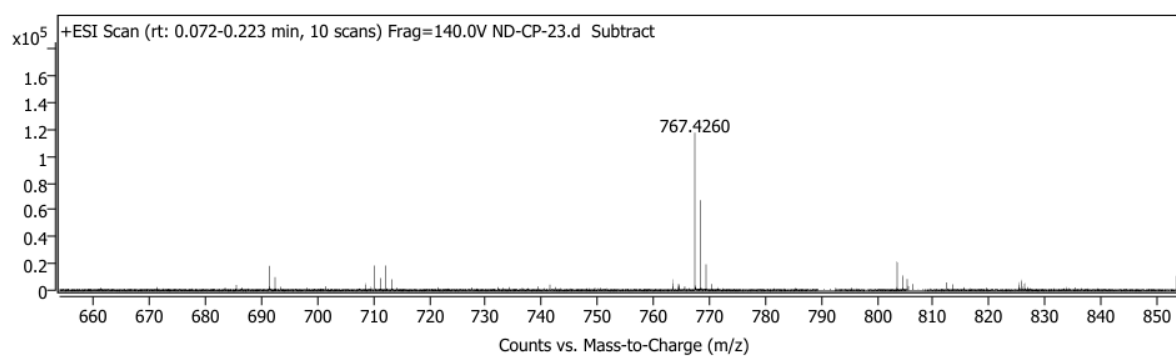

**Figure S14.** HRMS spectra of **PDI-2**

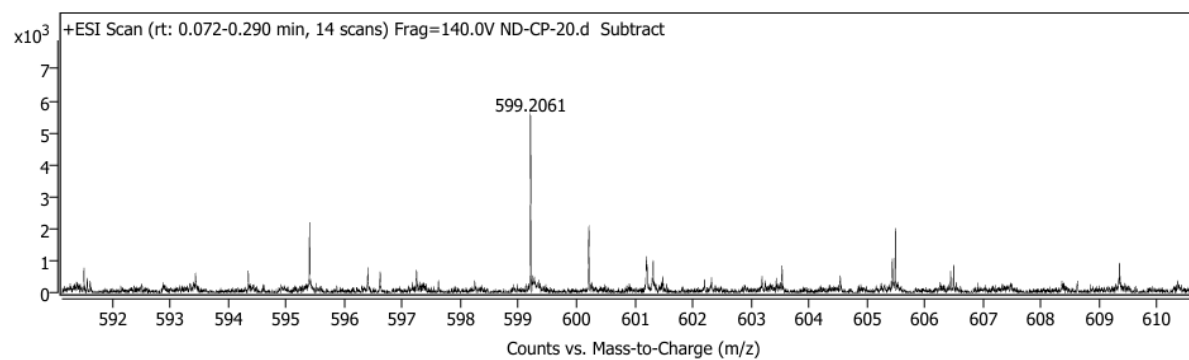

**Figure S15.** HRMS spectra of **PDI-3**

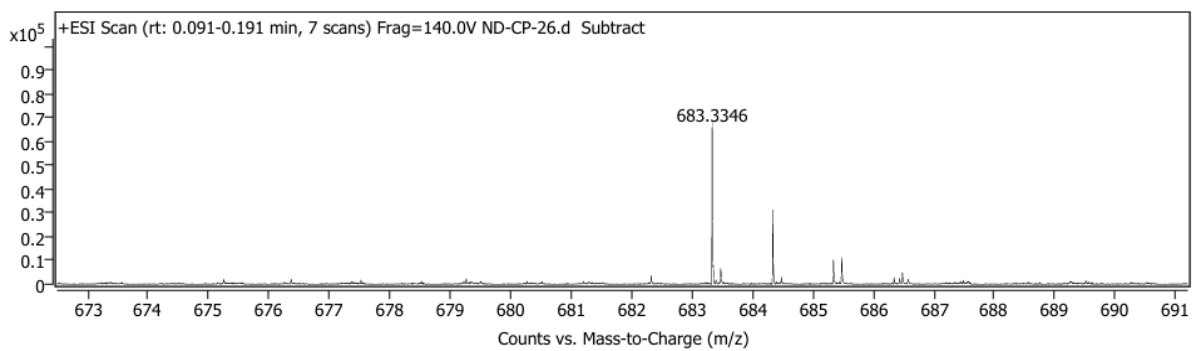

**Figure S16.** HRMS spectra of PDI-4

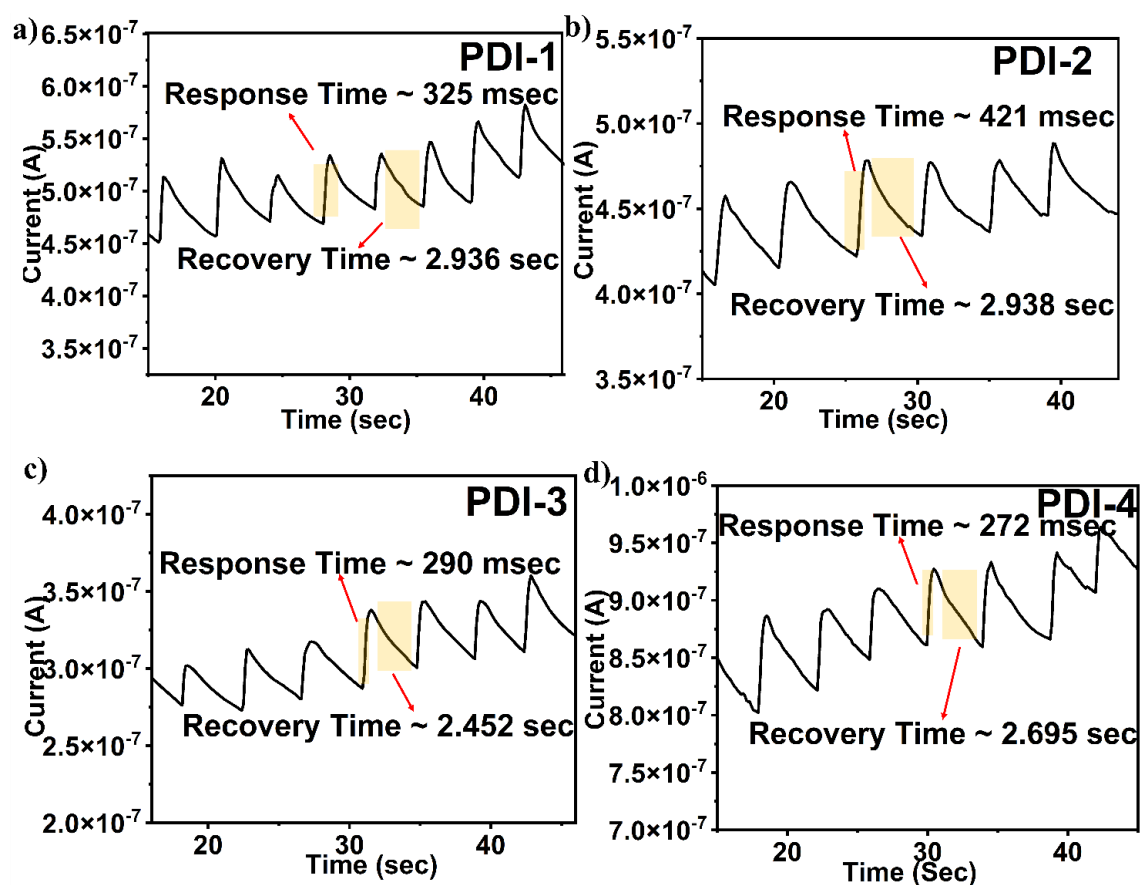

**Figure S17:** The fabricated PDI-based breath sensors' Response and recovery times.

**Table. S1:** Comparison between the PDI-based sensor with sensors reported in the existing literature

| Material                                                                                        | Substrate                    | Deposition Technique                                              | Range of Detection | Pressure Sensitivity                         | Theoretical Validation using DFT | Reference |
|-------------------------------------------------------------------------------------------------|------------------------------|-------------------------------------------------------------------|--------------------|----------------------------------------------|----------------------------------|-----------|
| C-PPy@MF                                                                                        | 3D-macroporous melamine foam | ultrasonic irradiation                                            | 1-90 kPa           | 2 kPa <sup>-1</sup>                          | No                               | [1]       |
| Elastic microstructured conducting polymer (EMCP) with polypyrrole interconnects                | -                            | -                                                                 | >1kPa              | <0.4 kPa <sup>-1</sup>                       | No                               | [2]       |
| Polypyrrole (PPy) with Fe <sup>3+</sup> arrays                                                  | Cellulose paper              | In-situ growth with PPy vapors                                    | >75Pa              | 1.09 kPa <sup>-1</sup>                       | No                               | [3]       |
| PDMS with sodium bicarbonate                                                                    | ITO coated PET               | Drop casting                                                      | 0.33-250 kPa       | 0.01 kPa <sup>-1</sup>                       | No                               | [4]       |
| PtSe <sub>2</sub>                                                                               | Polyimide                    | CVD, Photolithography, followed by a Reactive Ion etching process | -                  | 1.64 10 <sup>-3</sup> mbar <sup>-1</sup>     | Yes                              | [5]       |
| 3D conductive network (Polyaniline filler with silk fibroin and poly (lactic-co-glycolic acid)) | ITO coated glass             | Doctor-blade coating                                              | 0-165.3 kPa        | 2.54 kPa <sup>-1</sup>                       | No                               | [6]       |
| Perylene diimide (PDI-1, PDI-2, PDI-3, and PDI-4)                                               | Cellulose paper              | Vacuum filtration                                                 | 1.477-3.185 kPa    | 0.315, 1.266, 0.749, 2.120 kPa <sup>-1</sup> | Yes                              | This work |

**References:**

[1] Veeralingam, S., Praveen, S., Vemula, M. and Badhulika, S., 2022. One-step synthesis of carbon-doped PPy nanoparticles interspersed in 3D porous melamine foam as a high-performance piezoresistive pressure, strain, and breath sensor. *Materials Chemistry Frontiers*, 6(5), pp.570-579.

- [2] Pan, L., Chortos, A., Yu, G., Wang, Y., Isaacson, S., Allen, R., Shi, Y., Dauskardt, R. and Bao, Z., 2014. An ultra-sensitive resistive pressure sensor based on hollow-sphere microstructure induced elasticity in conducting polymer film. *Nature communications*, 5(1), p.3002.
- [3] Zang, X., Jiang, Y., Wang, X., Wang, X., Ji, J. and Xue, M., 2018. Highly sensitive pressure sensors based on conducting polymer-coated paper. *Sensors and Actuators B: Chemical*, 273, pp.1195-1201.
- [4] Chen, S., Zhuo, B. and Guo, X., 2016. Large area one-step facile processing of microstructured elastomeric dielectric film for high sensitivity and durable sensing over wide pressure range. *ACS applied materials & interfaces*, 8(31), pp.20364-20370.
- [5] Wagner, S., Yim, C., McEvoy, N., Kataria, S., Yokaribas, V., Kuc, A., Pindl, S., Fritzen, C.P., Heine, T., Duesberg, G.S. and Lemme, M.C., 2018. Highly sensitive electromechanical piezoresistive pressure sensors based on large-area layered PtSe<sub>2</sub> films. *Nano letters*, 18(6), pp.3738-3745.
- [6] Xu, M., Cai, H., Liu, Z., Chen, F., Chen, L., Chen, X., Cheng, X., Dai, F. and Li, Z., 2021. Breathable, Degradable Piezoresistive Skin Sensor Based on a Sandwich Structure for High-Performance Pressure Detection. *Advanced Electronic Materials*, 7(10), p.2100368.
